# Supplementary material
Source: publisher figshare collection journal article supplement (https://springernature.figshare.com/ndownloader/files/7100204)

**Supplementary data**

**Physico-chemical analyses of plant biostimulant formulations and characterisation of commercial products by instrumental techniques**

Sharma1 H.S.S., Selby1 C., Carmichael1 E., McRoberts 1 C., Rao1 J.R., Ambrosino2 P., Chiurazzi2 M. and Pucci2 M.

Sustainable Agriculture and Food Science Division,1 Agri-Food and Biosciences Institute, Newforge Lane, Belfast, BT9 5PX, UK; Research and development 2, Agriges srl, Contrada Selva di sotto zona industriale, 82035 San Salvatore Telesino (BN), Italy.

Corresponding author: Shekhar.Sharma@afbini.gov.uk

Figure S1. Principal component analysis (PCA) score plot of TGA weight loss data showing three distinct clusters – (a) Manek, (b) Ecoryg and Rygex and (c) Rizoset, Algavyt and Algavyt Zn/Mn and two PCAs explained 83% of the variations between the 6 products.


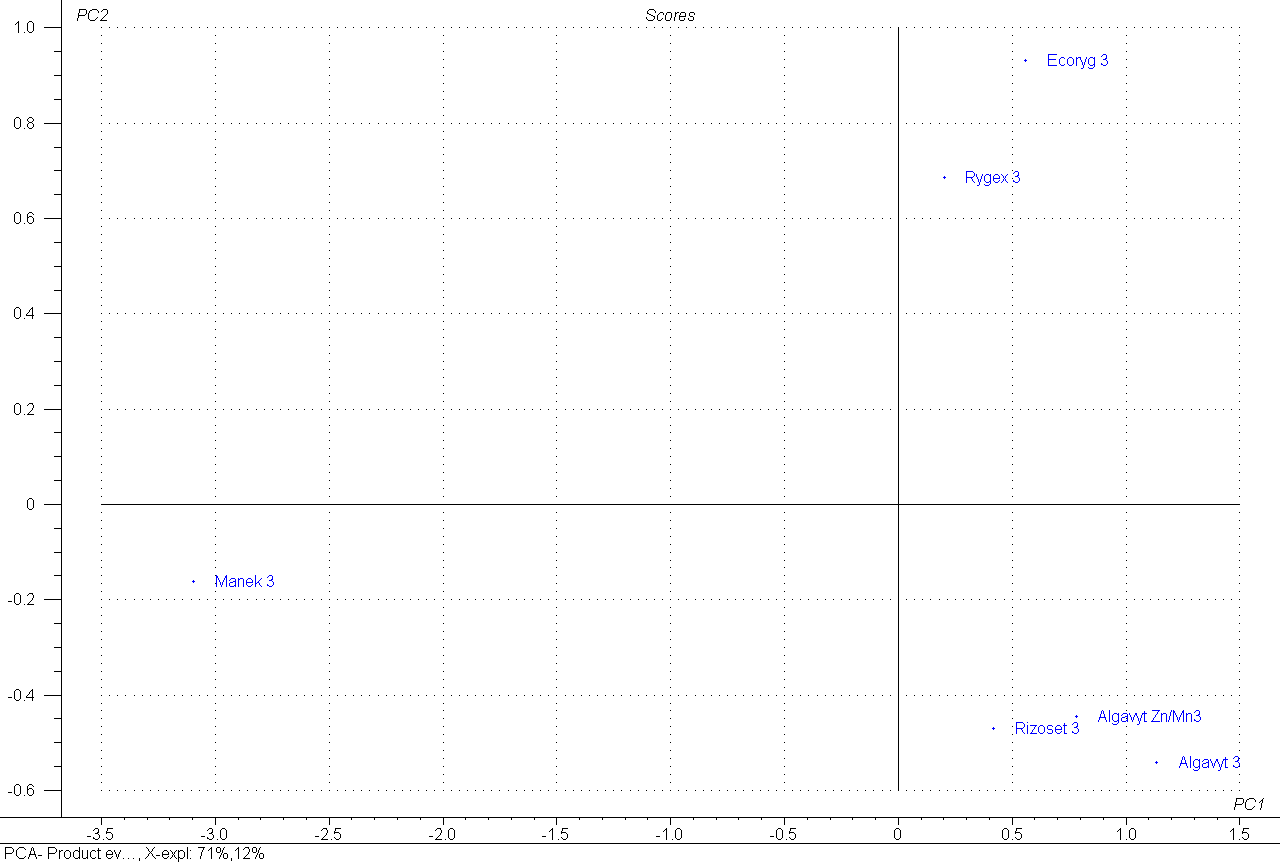

Supplement: Supplementary file 1 [file 7100204]
